# Supplementary material
Source: PubMed Central journal article supplement (PMC6206542)

Supplementary Material

Appendix 1

A

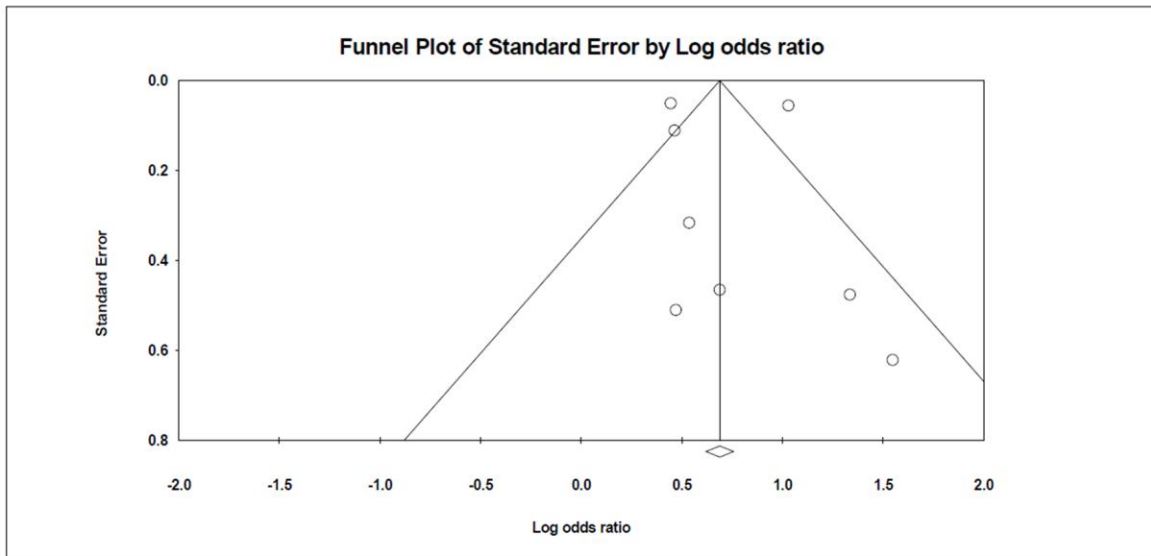

B

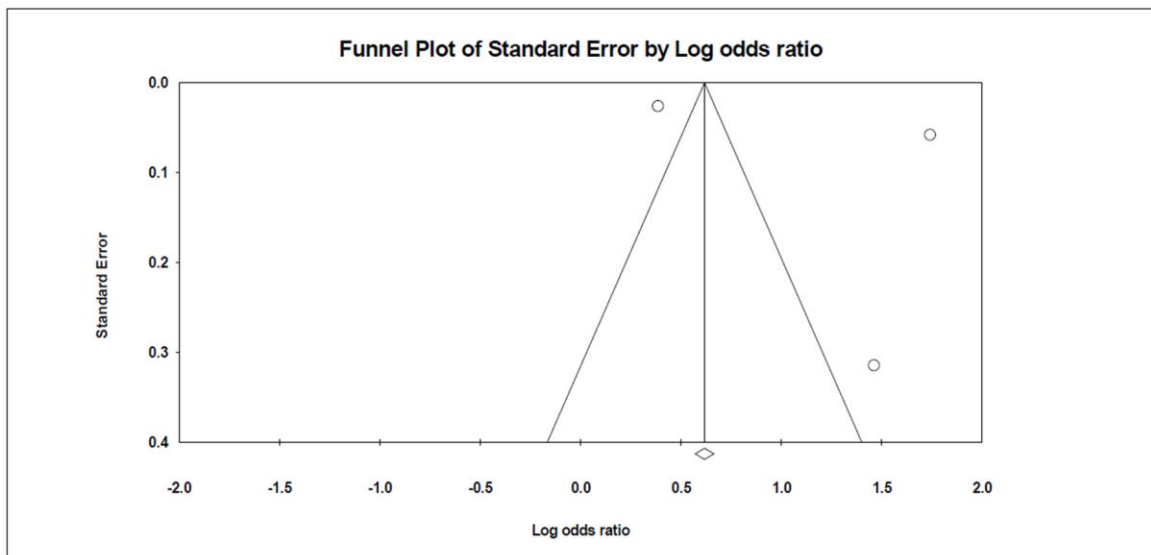

C

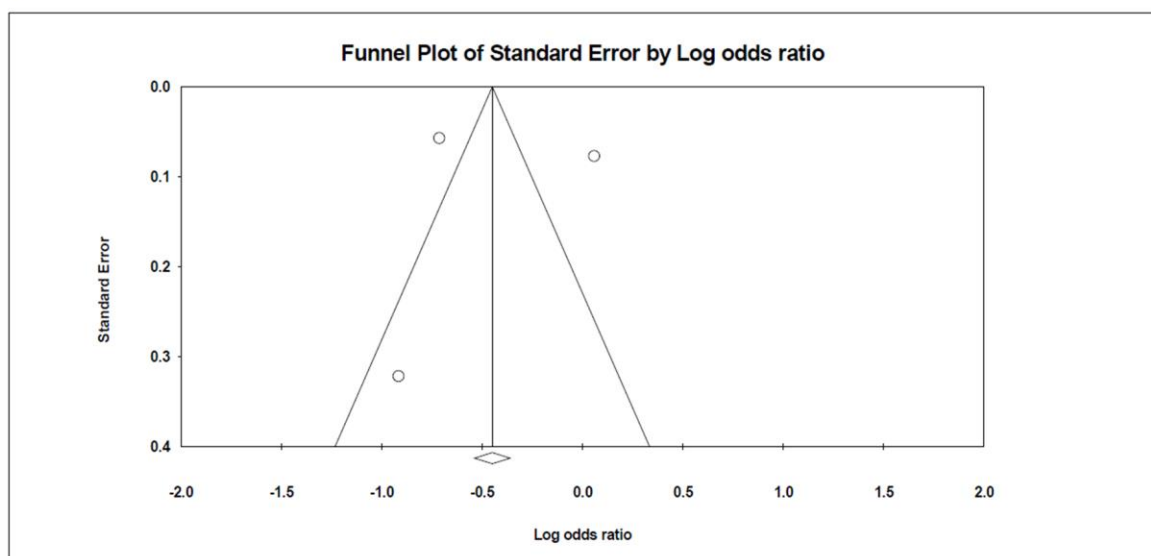

Appendix 2

A

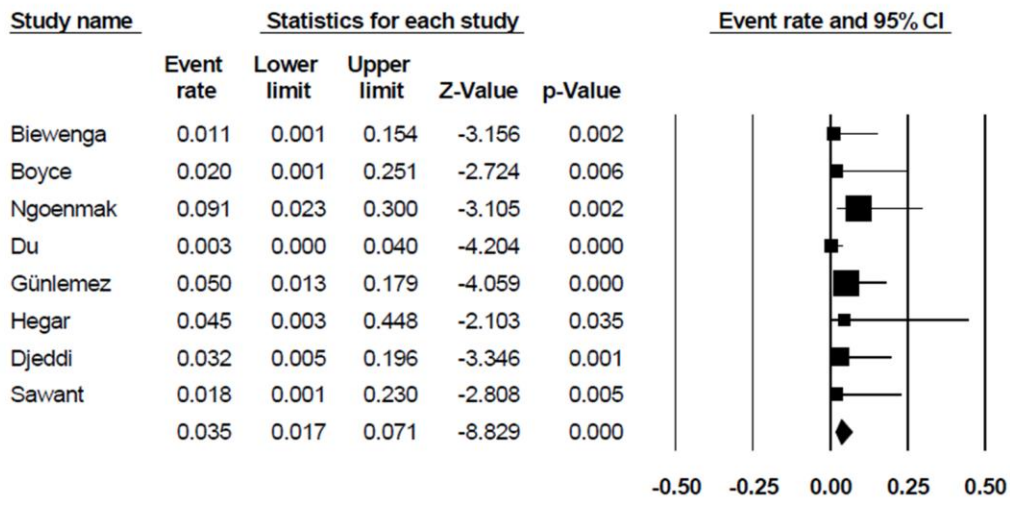

B

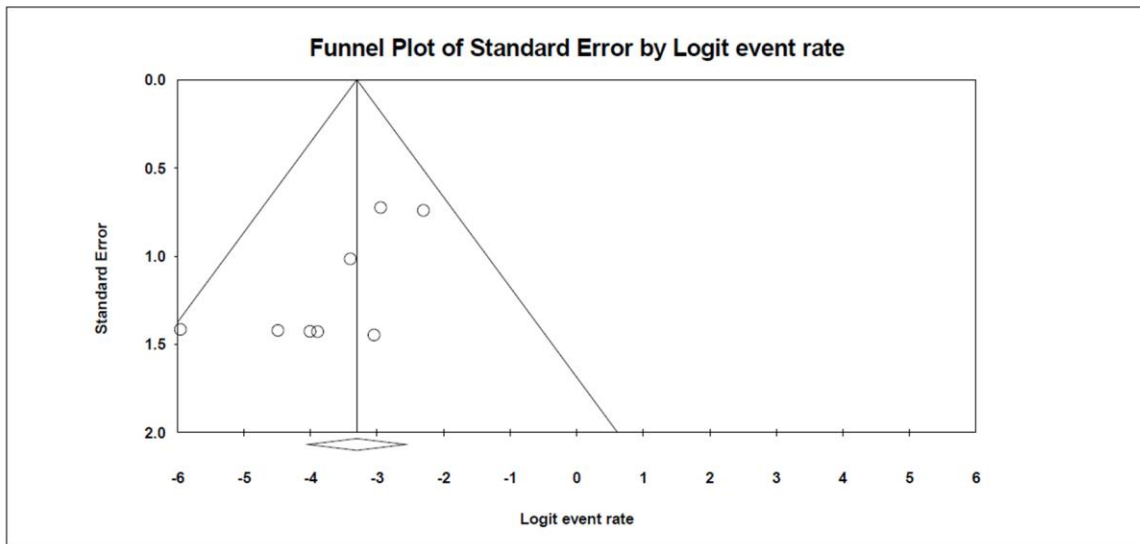

## Appendix 3

A

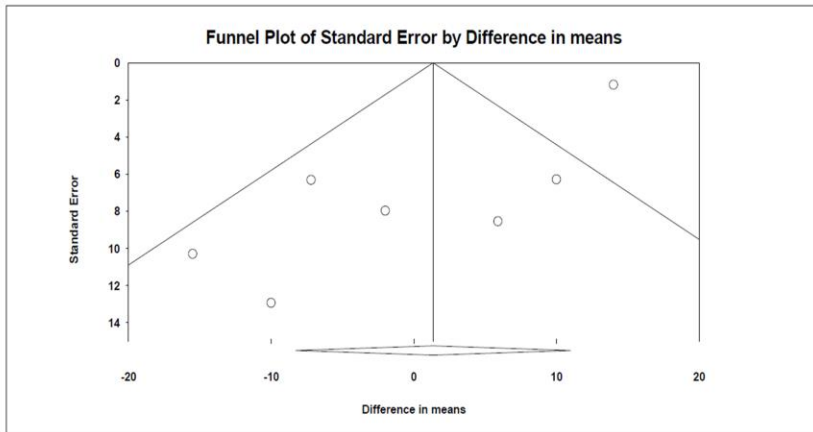

B

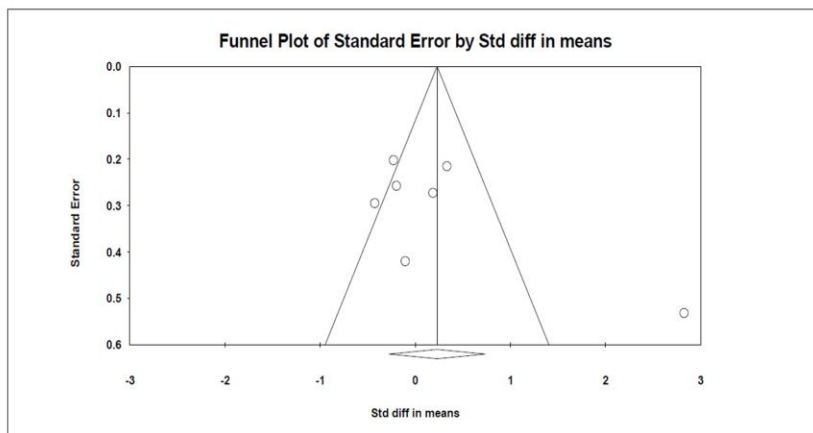

C

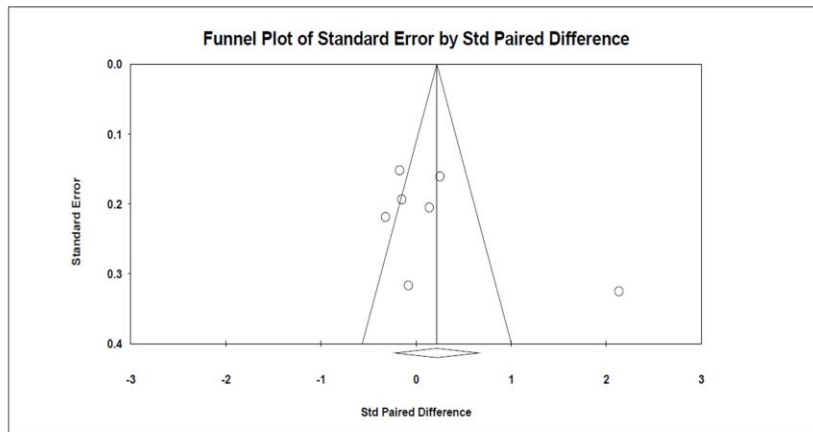

D

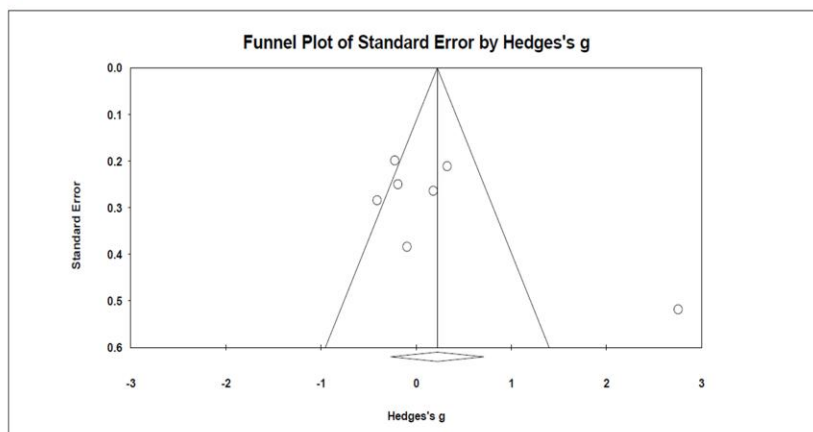

Supplement: Supplemental_material.pdf [file Supplemental_material.pdf]
